# Supplementary material for: Polymeric Sorbent Sheets Coupled to Direct Analysis in Real Time Mass Spectrometry for Trace-Level Volatile Analysis—A Multi-Vineyard Evaluation Study
Source: MDPI journal article supplement (doi:10.3390/foods9040409), 2020-04-02
Supplement: s1 [file s1]

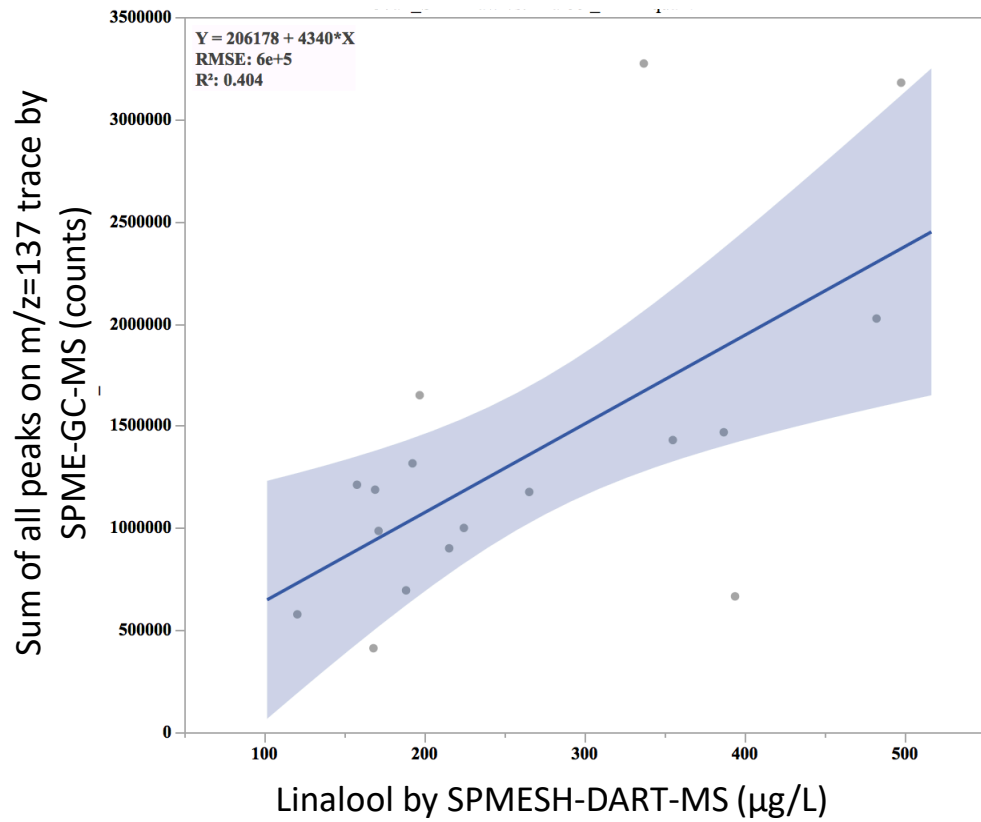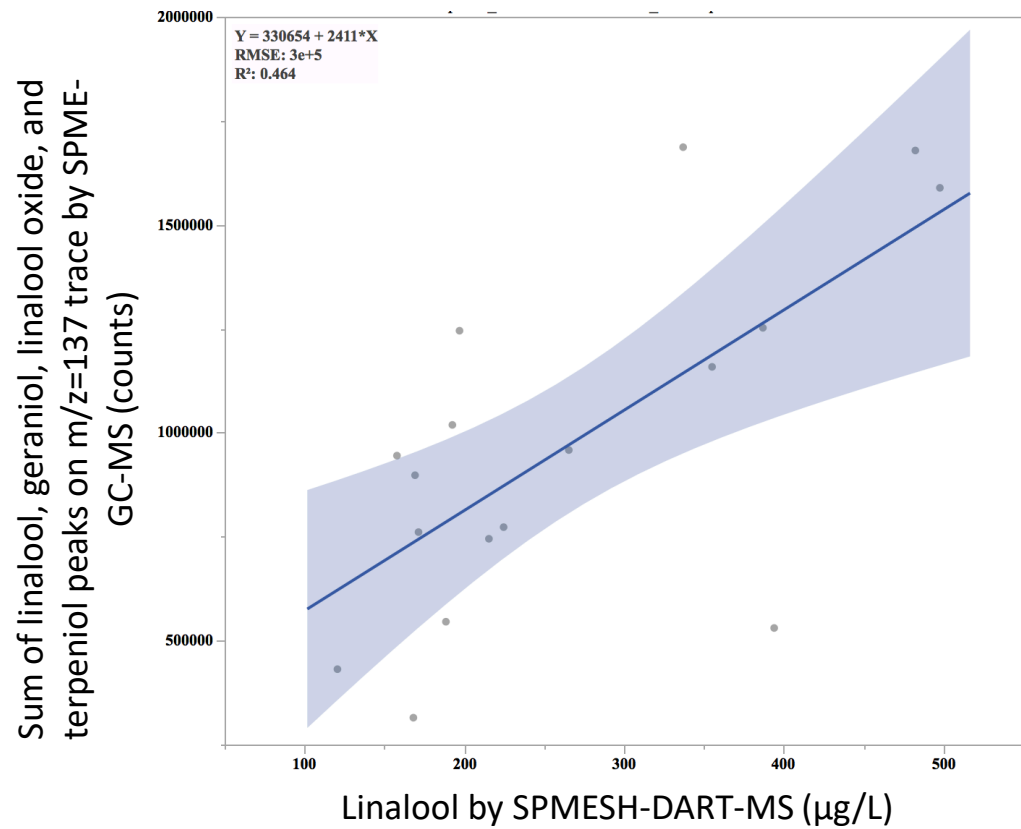

Supplementary Figure 1 – Plots of linalool measured across grape samples by SPMESH-DART-MS vs. the sum of all m/z = 137 peaks by SPME-GC-MS (left) and the sum of m/z=137 peaks for the four major monoterpenes (linalool, geraniol, linalool oxide, and alpha-terpeniol) by SPME-GC-MS (right).
